# Supplementary material for: Structural insights into SorCS2–Nerve Growth Factor complex formation
Source: PubMed Central journal article supplement (PMC6065357; doi:10.1038/s41467-018-05405-z), 2018-07-30
Supplement: 41467_2018_5405_MOESM3_ESM.pdf [file 41467_2018_5405_MOESM3_ESM.pdf]

### **Description of Additional Supplementary Files**

File Name: Supplementary Movie 1

Description: The full-length extracellular segment of the SorCS2 receptor undergoes a large and global conformational change upon NGF ligand binding.
